# Supplementary material for: Spatial–temporal variations in riverine carbon strongly influenced by local hydrological events in an alpine catchment
Source: Copernicus journal article supplement (doi:10.5194/bg-18-3015-2021), 2021-05-20
Supplement: Supplementary file 1 [file Dataset for LOADEST.xlsx]

## Sheet: Sheet1
river	site	date	discharge (m3 s-1)	DOC (mg L-1)	DIC (mg L-1)	DOC (Mg day-1)	DIC (Mg day-1)	DOC (mg L-1)	DIC (mg L-1)	DOC (Mg day-1)	DIC (Mg day-1)
				Measured Concentration		Measured Flux		AMLE Concentration		AMLE Flux
Shaliu River	SLH-4	2015-05-01	2.32198					2.862	39.431	0.574	7.911
Shaliu River	SLH-4	2015-05-02	2.46356					2.855	39.248	0.608	8.354
Shaliu River	SLH-4	2015-05-03	2.32198					2.862	39.505	0.574	7.925
Shaliu River	SLH-4	2015-05-04	4.44574					2.787	36.731	1.071	14.109
Shaliu River	SLH-4	2015-05-05	3.99267	2.3	45.713	0.793424	15.7695	2.799	37.296	0.966	12.866
Shaliu River	SLH-4	2015-05-06	3.90772					2.802	37.438	0.946	12.64
Shaliu River	SLH-4	2015-05-07	3.82277					2.804	37.585	0.926	12.414
Shaliu River	SLH-4	2015-05-08	3.34138					2.82	38.241	0.814	11.04
Shaliu River	SLH-4	2015-05-09	4.21921					2.793	37.198	1.018	13.56
Shaliu River	SLH-4	2015-05-10	3.90772					2.802	37.612	0.946	12.699
Shaliu River	SLH-4	2015-05-11	2.80337					2.84	39.12	0.688	9.475
Shaliu River	SLH-4	2015-05-12	2.86					2.838	39.086	0.701	9.658
Shaliu River	SLH-4	2015-05-13	3.73782					2.807	37.963	0.906	12.26
Shaliu River	SLH-4	2015-05-14	4.36079					2.789	37.269	1.051	14.042
Shaliu River	SLH-4	2015-05-15	5.04039					2.773	36.584	1.208	15.932
Shaliu River	SLH-4	2015-05-16	5.18198					2.77	36.489	1.24	16.337
Shaliu River	SLH-4	2015-05-17	5.3802					2.766	36.341	1.286	16.893
Shaliu River	SLH-4	2015-05-18	6.20138					2.75	35.618	1.473	19.084
Shaliu River	SLH-4	2015-05-19	6.2297					2.749	35.645	1.48	19.186
Shaliu River	SLH-4	2015-05-20	6.54119	2.3	29.16	1.29986	16.48	2.744	35.424	1.551	20.02
Shaliu River	SLH-4	2015-05-21	6.37128					2.747	35.625	1.512	19.611
Shaliu River	SLH-4	2015-05-22	6.88099					2.738	35.244	1.628	20.953
Shaliu River	SLH-4	2015-05-23	6.9093					2.738	35.273	1.634	21.057
Shaliu River	SLH-4	2015-05-24	5.74831					2.758	36.361	1.37	18.059
Shaliu River	SLH-4	2015-05-25	6.14475					2.751	36.052	1.46	19.14
Shaliu River	SLH-4	2015-05-26	5.94653					2.754	36.292	1.415	18.646
Shaliu River	SLH-4	2015-05-27	6.3996					2.746	35.94	1.518	19.872
Shaliu River	SLH-4	2015-05-28	8.89148					2.709	34.059	2.082	26.165
Shaliu River	SLH-4	2015-05-29	13.1107					2.667	31.653	3.021	35.855
Shaliu River	SLH-4	2015-05-30	7.47564					2.729	35.219	1.762	22.748
Shaliu River	SLH-4	2015-05-31	5.57841					2.762	36.944	1.331	17.806
Shaliu River	SLH-4	2015-06-01	4.58732					2.784	38.04	1.103	15.077
Shaliu River	SLH-4	2015-06-02	5.35188					2.766	37.294	1.279	17.245
Shaliu River	SLH-4	2015-06-03	17.8113					2.633	29.883	4.052	45.987
Shaliu River	SLH-4	2015-06-04	21.2093					2.614	28.74	4.791	52.665
Shaliu River	SLH-4	2015-06-05	12.9974	2.88	30.59	3.23417	34.3519	2.668	32.112	2.996	36.061
Shaliu River	SLH-4	2015-06-06	8.97643					2.708	34.545	2.101	26.792
Shaliu River	SLH-4	2015-06-07	7.78713					2.724	35.477	1.833	23.869
Shaliu River	SLH-4	2015-06-08	5.86158					2.756	37.191	1.396	18.835
Shaliu River	SLH-4	2015-06-09	5.29525					2.768	37.818	1.266	17.302
Shaliu River	SLH-4	2015-06-10	7.44732					2.729	35.942	1.756	23.127
Shaliu River	SLH-4	2015-06-11	7.02257					2.736	36.358	1.66	22.06
Shaliu River	SLH-4	2015-06-12	6.9093					2.738	36.521	1.634	21.802
Shaliu River	SLH-4	2015-06-13	6.85267					2.739	36.639	1.621	21.693
Shaliu River	SLH-4	2015-06-14	6.76772					2.74	36.783	1.602	21.508
Shaliu River	SLH-4	2015-06-15	7.0792					2.735	36.587	1.673	22.378
Shaliu River	SLH-4	2015-06-16	8.63663					2.713	35.446	2.024	26.45
Shaliu River	SLH-4	2015-06-17	15.2061					2.65	31.799	3.482	41.778
Shaliu River	SLH-4	2015-06-18	31.7998					2.571	26.657	7.063	73.24
Shaliu River	SLH-4	2015-06-19	21.8889					2.611	29.381	4.938	55.566
Shaliu River	SLH-4	2015-06-20	18.0095	2.59524	25.46	4.03825	39.6163	2.632	30.818	4.096	47.953
Shaliu River	SLH-4	2015-06-21	17.6131					2.634	31.036	4.009	47.23
Shaliu River	SLH-4	2015-06-22	17.8962					2.633	30.988	4.071	47.915
Shaliu River	SLH-4	2015-06-23	22.5968					2.607	29.397	5.091	57.393
Shaliu River	SLH-4	2015-06-24	27.8071					2.585	27.964	6.211	67.184
Shaliu River	SLH-4	2015-06-25	34.6032					2.562	26.435	7.659	79.034
Shaliu River	SLH-4	2015-06-26	18.8873					2.627	30.862	4.287	50.362
Shaliu River	SLH-4	2015-06-27	22.0871					2.61	29.806	4.981	56.879
Shaliu River	SLH-4	2015-06-28	26.7028					2.59	28.494	5.974	65.738
Shaliu River	SLH-4	2015-06-29	41.9089					2.541	25.258	9.202	91.459
Shaliu River	SLH-4	2015-06-30	25.2869					2.595	29.01	5.67	63.381
Shaliu River	SLH-4	2015-07-01	32.9041					2.567	27.142	7.298	77.162
Shaliu River	SLH-4	2015-07-02	57.3132					2.509	23.133	12.422	114.55
Shaliu River	SLH-4	2015-07-03	57.2					2.509	23.197	12.398	114.64
Shaliu River	SLH-4	2015-07-04	49.4129					2.524	24.316	10.776	103.81
Shaliu River	SLH-4	2015-07-05	50.4039	2.54235	25.52	11.0717	111.137	2.522	24.221	10.983	105.48
Shaliu River	SLH-4	2015-07-06	41.5974					2.542	25.69	9.137	92.332
Shaliu River	SLH-4	2015-07-07	27.4107					2.587	28.841	6.126	68.303
Shaliu River	SLH-4	2015-07-08	82.4019					2.471	20.803	17.59	148.11
Shaliu River	SLH-4	2015-07-09	66.0915					2.494	22.437	14.239	128.12
Shaliu River	SLH-4	2015-07-10	34.6881					2.562	27.263	7.677	81.71
Shaliu River	SLH-4	2015-07-11	28.4018					2.583	28.816	6.338	70.712
Shaliu River	SLH-4	2015-07-12	48.1952					2.527	24.913	10.521	103.74
Shaliu River	SLH-4	2015-07-13	26.901					2.589	29.341	6.017	68.196
Shaliu River	SLH-4	2015-07-14	21.6907					2.612	31.008	4.895	58.111
Shaliu River	SLH-4	2015-07-15	19.5952					2.623	31.823	4.441	53.878
Shaliu River	SLH-4	2015-07-16	19.7935					2.622	31.813	4.484	54.405
Shaliu River	SLH-4	2015-07-17	15.999					2.645	33.44	3.656	46.225
Shaliu River	SLH-4	2015-07-18	14.1018					2.659	34.419	3.239	41.936
Shaliu River	SLH-4	2015-07-19	13.5921					2.663	34.751	3.127	40.81
Shaliu River	SLH-4	2015-07-20	12.6859	2.72054	34.46	2.98189	37.7704	2.67	35.312	2.927	38.704
Shaliu River	SLH-4	2015-07-21	15.6026					2.648	33.89	3.569	45.686
Shaliu River	SLH-4	2015-07-22	13.7053					2.662	34.898	3.152	41.324
Shaliu River	SLH-4	2015-07-23	11.8931					2.677	35.978	2.751	36.97
Shaliu River	SLH-4	2015-07-24	11.1002					2.685	36.534	2.575	35.038
Shaliu River	SLH-4	2015-07-25	10.7038					2.689	36.857	2.487	34.086
Shaliu River	SLH-4	2015-07-26	10.7038					2.689	36.929	2.487	34.152
Shaliu River	SLH-4	2015-07-27	11.2135					2.684	36.673	2.6	35.53
Shaliu River	SLH-4	2015-07-28	11.4117					2.682	36.618	2.644	36.104
Shaliu River	SLH-4	2015-07-29	12.601					2.671	35.978	2.908	39.17
Shaliu River	SLH-4	2015-07-30	11.6948					2.679	36.581	2.707	36.963
Shaliu River	SLH-4	2015-07-31	10.7038					2.689	37.277	2.487	34.474
Shaliu River	SLH-4	2015-08-01	11.4966					2.681	36.838	2.663	36.592
Shaliu River	SLH-4	2015-08-02	18.8873					2.627	33.228	4.287	54.223
Shaliu River	SLH-4	2015-08-03	34.8014					2.561	28.544	7.701	85.828
Shaliu River	SLH-4	2015-08-04	18.8024					2.627	33.381	4.268	54.228
Shaliu River	SLH-4	2015-08-05	14.6115	2.85664	32.62	3.60632	41.1805	2.655	35.345	3.352	44.621
Shaliu River	SLH-4	2015-08-06	14.8946					2.653	35.264	3.414	45.381
Shaliu River	SLH-4	2015-08-07	18.8024					2.627	33.555	4.268	54.511
Shaliu River	SLH-4	2015-08-08	22.2004					2.609	32.325	5.005	62.003
Shaliu River	SLH-4	2015-08-09	18.6042					2.629	33.75	4.225	54.25
Shaliu River	SLH-4	2015-08-10	15.4044					2.649	35.25	3.526	46.915
Shaliu River	SLH-4	2015-08-11	12.9974					2.668	36.582	2.996	41.081
Shaliu River	SLH-4	2015-08-12	11.2984					2.683	37.671	2.619	36.774
Shaliu River	SLH-4	2015-08-13	12.2045					2.675	37.166	2.82	39.191
Shaliu River	SLH-4	2015-08-14	15.2911					2.65	35.533	3.501	46.944
Shaliu River	SLH-4	2015-08-15	12.7992					2.669	36.931	2.952	40.84
Shaliu River	SLH-4	2015-08-16	13.1107					2.667	36.807	3.021	41.694
Shaliu River	SLH-4	2015-08-17	12.9125					2.668	36.977	2.977	41.253
Shaliu River	SLH-4	2015-08-18	10.5905					2.69	38.496	2.462	35.225
Shaliu River	SLH-4	2015-08-19	10.1091					2.695	38.89	2.354	33.968
Shaliu River	SLH-4	2015-08-20	9.99584	2.47	35.59	2.13319	30.737	2.697	39.029	2.329	33.707
Shaliu River	SLH-4	2015-08-21	9.7693					2.699	39.249	2.278	33.129
Shaliu River	SLH-4	2015-08-22	9.5994					2.701	39.43	2.24	32.703
Shaliu River	SLH-4	2015-08-23	9.17465					2.706	39.809	2.145	31.556
Shaliu River	SLH-4	2015-08-24	8.69326					2.712	40.245	2.037	30.228
Shaliu River	SLH-4	2015-08-25	8.63663					2.713	40.345	2.024	30.106
Shaliu River	SLH-4	2015-08-26	8.86316					2.71	40.214	2.075	30.795
Shaliu River	SLH-4	2015-08-27	9.11802					2.707	40.062	2.132	31.561
Shaliu River	SLH-4	2015-08-28	9.2596					2.705	40.001	2.164	32.002
Shaliu River	SLH-4	2015-08-29	8.58					2.713	40.594	2.012	30.093
Shaliu River	SLH-4	2015-08-30	8.77821					2.711	40.481	2.056	30.702
Shaliu River	SLH-4	2015-08-31	8.49505					2.715	40.76	1.992	29.917
Shaliu River	SLH-4	2015-09-01	8.4101					2.716	40.878	1.973	29.703
Shaliu River	SLH-4	2015-09-02	10.5055					2.691	39.302	2.443	35.674
Shaliu River	SLH-4	2015-09-03	25.0038					2.597	32.509	5.609	70.23
Shaliu River	SLH-4	2015-09-04	22.9933					2.606	33.224	5.176	66.003
Shaliu River	SLH-4	2015-09-05	11.6099	3.02	43.719	3.02935	43.8543	2.68	38.668	2.688	38.788
Shaliu River	SLH-4	2015-09-06	10.5055					2.691	39.459	2.443	35.816
Shaliu River	SLH-4	2015-09-07	11.2984					2.683	38.947	2.619	38.019
Shaliu River	SLH-4	2015-09-08	14.6115					2.655	36.99	3.352	46.697
Shaliu River	SLH-4	2015-09-09	21.0111					2.615	34.101	4.748	61.905
Shaliu River	SLH-4	2015-09-10	11.8081					2.678	38.707	2.732	39.49
Shaliu River	SLH-4	2015-09-11	12.4877					2.672	38.305	2.883	41.329
Shaliu River	SLH-4	2015-09-12	10.5055					2.691	39.655	2.443	35.994
Shaliu River	SLH-4	2015-09-13	9.4295					2.703	40.49	2.202	32.988
Shaliu River	SLH-4	2015-09-14	9.14633					2.706	40.743	2.139	32.197
Shaliu River	SLH-4	2015-09-15	9.06138					2.707	40.838	2.12	31.972
Shaliu River	SLH-4	2015-09-16	9.20297					2.706	40.749	2.151	32.401
Shaliu River	SLH-4	2015-09-17	10.5055					2.691	39.779	2.443	36.107
Shaliu River	SLH-4	2015-09-18	11.2135					2.684	39.303	2.6	38.078
Shaliu River	SLH-4	2015-09-19	9.2596					2.705	40.768	2.164	32.616
Shaliu River	SLH-4	2015-09-20	10.1091	3.03	44.0685	2.64648	38.4906	2.695	40.129	2.354	35.05
Shaliu River	SLH-4	2015-09-21	12.601					2.671	38.448	2.908	41.859
Shaliu River	SLH-4	2015-09-22	11.4966					2.681	39.176	2.663	38.914
Shaliu River	SLH-4	2015-09-23	15.4893					2.648	36.831	3.544	49.29
Shaliu River	SLH-4	2015-09-24	13.7053					2.662	37.82	3.152	44.784
Shaliu River	SLH-4	2015-09-25	13.5071					2.663	37.944	3.108	44.281
Shaliu River	SLH-4	2015-09-26	13.1107					2.667	38.187	3.021	43.257
Shaliu River	SLH-4	2015-09-27	12.9974					2.668	38.262	2.996	42.967
Shaliu River	SLH-4	2015-09-28	11.8931					2.677	38.964	2.751	40.038
Shaliu River	SLH-4	2015-09-29	10.9869					2.686	39.584	2.55	37.576
Shaliu River	SLH-4	2015-09-30	11.2984					2.683	39.37	2.619	38.432
Shaliu River	SLH-4	2015-10-01	11.4966					2.681	39.234	2.663	38.972
Shaliu River	SLH-4	2015-10-02	11.8931					2.677	38.968	2.751	40.042
Shaliu River	SLH-4	2015-10-03	10.9869					2.686	39.583	2.55	37.575
Shaliu River	SLH-4	2015-10-04	10.5905					2.69	39.863	2.462	36.475
Shaliu River	SLH-4	2015-10-05	8.89148	2.27	44.904	1.74387	34.4964	2.709	41.183	2.082	31.638
Shaliu River	SLH-4	2015-10-06	8.32515					2.717	41.666	1.954	29.97
Shaliu River	SLH-4	2015-10-07	7.95703					2.722	41.989	1.871	28.867
Shaliu River	SLH-4	2015-10-08	7.75881					2.725	42.164	1.826	28.265
Shaliu River	SLH-4	2015-10-09	7.41901					2.73	42.476	1.75	27.227
Shaliu River	SLH-4	2015-10-10	7.39069					2.73	42.491	1.743	27.133
Shaliu River	SLH-4	2015-10-11	7.39069					2.73	42.477	1.743	27.124
Shaliu River	SLH-4	2015-10-12	6.96594					2.737	42.884	1.647	25.81
Shaliu River	SLH-4	2015-10-13	7.02257					2.736	42.808	1.66	25.974
Shaliu River	SLH-4	2015-10-14	6.85267					2.739	42.963	1.621	25.437
Shaliu River	SLH-4	2015-10-15	6.20138					2.75	43.639	1.473	23.382
Shaliu River	SLH-4	2015-10-16	5.80495					2.757	44.068	1.383	22.102
Shaliu River	SLH-4	2015-10-17	5.52178					2.763	44.38	1.318	21.173
Shaliu River	SLH-4	2015-10-18	5.26693					2.768	44.666	1.26	20.326
Shaliu River	SLH-4	2015-10-19	5.43683					2.764	44.431	1.299	20.871
Shaliu River	SLH-4	2015-10-20	5.40851	2.08	45.331	0.971975	21.183	2.765	44.437	1.292	20.765
Shaliu River	SLH-4	2015-10-21	6.93762					2.737	42.697	1.641	25.593
Shaliu River	SLH-4	2015-10-22	6.93762					2.737	42.665	1.641	25.574
Shaliu River	SLH-4	2015-10-23	7.02257					2.736	42.546	1.66	25.815
Shaliu River	SLH-4	2015-10-24	7.16416					2.734	42.368	1.692	26.225
Shaliu River	SLH-4	2015-10-25	7.36237					2.731	42.136	1.737	26.803
Shaliu River	SLH-4	2015-10-26	7.27742					2.732	42.181	1.718	26.522
Shaliu River	SLH-4	2015-10-27	7.64554					2.726	41.785	1.801	27.602
Shaliu River	SLH-4	2015-10-28	7.75881					2.725	41.637	1.826	27.912
Shaliu River	SLH-4	2015-10-29	7.50396					2.728	41.836	1.769	27.124
Shaliu River	SLH-4	2015-10-30	7.47564					2.729	41.819	1.762	27.011
Shaliu River	SLH-4	2015-10-31	7.81544					2.724	41.451	1.839	27.99
Shaliu River	SLH-4	2015-11-01	7.30574					2.731	41.892	1.724	26.443
Shaliu River	SLH-4	2015-11-02	6.34297					2.747	42.839	1.506	23.477
Shaliu River	SLH-4	2015-11-03	5.74831					2.758	43.461	1.37	21.585
Shaliu River	SLH-4	2015-11-04	5.06871					2.772	44.239	1.214	19.374
Shaliu River	SLH-4	2015-11-05	4.81386	2.86	46.2426	1.18952	19.2331	2.778	44.516	1.156	18.515
Shaliu River	SLH-4	2015-11-06	4.33247					2.79	45.121	1.044	16.89
Shaliu River	SLH-4	2015-11-07	1.92554					2.883	49.22	0.48	8.189
Shaliu River	SLH-4	2015-11-08	1.89723					2.885	49.22	0.473	8.068
Shaliu River	SLH-4	2015-11-09	1.98218					2.88	48.983	0.493	8.389
Shaliu River	SLH-4	2015-11-10	1.67069					2.9	49.579	0.419	7.157
Shaliu River	SLH-4	2015-11-11	1.30257					2.929	50.313	0.33	5.662
Shaliu River	SLH-4	2015-11-12	1.18931					2.94	50.49	0.302	5.188
Shaliu River	SLH-4	2015-11-13	1.13267					2.945	50.543	0.288	4.946
Shaliu River	SLH-4	2015-11-14	1.10436					2.948	50.534	0.281	4.822
Shaliu River	SLH-4	2015-11-15	1.01941					2.958	50.638	0.261	4.46
Shaliu River	SLH-4	2015-11-16	1.04772					2.954	50.511	0.267	4.572
Shaliu River	SLH-4	2015-11-17	0.821188					2.983	50.854	0.212	3.608
Shaliu River	SLH-4	2015-11-18	0.906138					2.972	50.638	0.233	3.964
Shaliu River	SLH-4	2015-11-19	0.849505					2.979	50.663	0.219	3.718
Shaliu River	SLH-4	2015-11-20	0.906138	3.04	46.8198	0.238003	3.66554	2.972	50.49	0.233	3.953
Shaliu River	SLH-4	2015-11-21	0.821188					2.983	50.558	0.212	3.587
Shaliu River	SLH-4	2015-11-22	0.736237					2.996	50.603	0.191	3.219
Shaliu River	SLH-4	2015-11-23	0.764554					2.992	50.486	0.198	3.335
Shaliu River	SLH-4	2015-11-24	0.736237					2.996	50.446	0.191	3.209
Shaliu River	SLH-4	2015-11-25	0.764554					2.992	50.327	0.198	3.324
Shaliu River	SLH-4	2015-11-26	0.736237					2.996	50.284	0.191	3.199
Shaliu River	SLH-4	2015-11-27	0.764554					2.992	50.162	0.198	3.314
Shaliu River	SLH-4	2015-11-28	0.70792					3.001	50.152	0.184	3.068
Shaliu River	SLH-4	2015-11-29	0.764554					2.992	49.993	0.198	3.302
Shaliu River	SLH-4	2015-11-30	0.792871					2.988	49.866	0.205	3.416
Shaliu River	SLH-4	2015-12-01	0.821188					2.983	49.735	0.212	3.529
Shaliu River	SLH-4	2015-12-02	0.792871					2.988	49.69	0.205	3.404
Shaliu River	SLH-4	2015-12-03	0.906138					2.972	49.41	0.233	3.868
Shaliu River	SLH-4	2015-12-04	0.877821					2.975	49.371	0.226	3.744
Shaliu River	SLH-4	2015-12-05	0.849505	2.79	46.8179	0.204778	3.4363	2.979	49.33	0.219	3.621
Shaliu River	SLH-4	2015-12-06	0.792871					2.988	49.331	0.205	3.379
Shaliu River	SLH-4	2015-12-07	0.821188					2.983	49.195	0.212	3.49
Shaliu River	SLH-4	2015-12-08	0.877821					2.975	49.005	0.226	3.717
Shaliu River	SLH-4	2015-12-09	0.934455					2.968	48.808	0.24	3.941
Shaliu River	SLH-4	2015-12-10	0.962772					2.965	48.659	0.247	4.048
Shaliu River	SLH-4	2015-12-11	0.792871					2.988	48.864	0.205	3.347
Shaliu River	SLH-4	2015-12-12	0.70792					3.001	48.888	0.184	2.99
Shaliu River	SLH-4	2015-12-13	0.764554					2.992	48.717	0.198	3.218
Shaliu River	SLH-4	2015-12-14	0.736237					2.996	48.661	0.191	3.095
Shaliu River	SLH-4	2015-12-15	0.679604					3.006	48.633	0.176	2.856
Shaliu River	SLH-4	2015-12-16	0.679604					3.006	48.537	0.176	2.85
Shaliu River	SLH-4	2015-12-17	0.651287					3.011	48.469	0.169	2.727
Shaliu River	SLH-4	2015-12-18	0.70792					3.001	48.311	0.184	2.955
Shaliu River	SLH-4	2015-12-19	0.736237					2.996	48.176	0.191	3.064
Shaliu River	SLH-4	2015-12-20	0.764554	3.6	46.835	0.237807	3.0938	2.992	48.038	0.198	3.173
Shaliu River	SLH-4	2015-12-21	0.679604					3.006	48.048	0.176	2.821
Shaliu River	SLH-4	2015-12-22	0.70792					3.001	47.918	0.184	2.931
Shaliu River	SLH-4	2015-12-23	0.736237					2.996	47.783	0.191	3.04
Shaliu River	SLH-4	2015-12-24	0.764554					2.992	47.645	0.198	3.147
Shaliu River	SLH-4	2015-12-25	0.764554					2.992	47.545	0.198	3.141
Shaliu River	SLH-4	2015-12-26	0.70792					3.001	47.524	0.184	2.907
Shaliu River	SLH-4	2015-12-27	0.849505					2.979	47.212	0.219	3.465
Shaliu River	SLH-4	2015-12-28	0.849505					2.979	47.113	0.219	3.458
Shaliu River	SLH-4	2015-12-29	0.792871					2.988	47.108	0.205	3.227
Shaliu River	SLH-4	2015-12-30	0.792871					2.988	47.009	0.205	3.22
Shaliu River	SLH-4	2015-12-31	0.849505					2.979	46.818	0.219	3.436
Shaliu River	SLH-4	2016-01-01	0.821188					2.983	46.768	0.212	3.318
Shaliu River	SLH-4	2016-01-02	0.821188					2.983	46.67	0.212	3.311
Shaliu River	SLH-4	2016-01-03	0.792871					2.988	46.618	0.205	3.194
Shaliu River	SLH-4	2016-01-04	0.792871					2.988	46.52	0.205	3.187
Shaliu River	SLH-4	2016-01-05	0.792871	3.18	41.04	0.217843	2.81141	2.988	46.423	0.205	3.18
Shaliu River	SLH-4	2016-01-06	0.736237					2.996	46.41	0.191	2.952
Shaliu River	SLH-4	2016-01-07	0.70792					3.001	46.351	0.184	2.835
Shaliu River	SLH-4	2016-01-08	0.679604					3.006	46.287	0.176	2.718
Shaliu River	SLH-4	2016-01-09	0.651287					3.011	46.221	0.169	2.601
Shaliu River	SLH-4	2016-01-10	0.594653					3.022	46.169	0.155	2.372
Shaliu River	SLH-4	2016-01-11	0.566336					3.028	46.087	0.148	2.255
Shaliu River	SLH-4	2016-01-12	0.53802					3.034	45.998	0.141	2.138
Shaliu River	SLH-4	2016-01-13	0.509703					3.041	45.901	0.134	2.021
Shaliu River	SLH-4	2016-01-14	0.481386					3.047	45.793	0.127	1.905
Shaliu River	SLH-4	2016-01-15	0.424752					3.063	45.634	0.112	1.675
Shaliu River	SLH-4	2016-01-16	0.396435					3.071	45.486	0.105	1.558
Shaliu River	SLH-4	2016-01-17	0.368119					3.08	45.316	0.098	1.441
Shaliu River	SLH-4	2016-01-18	0.339802					3.09	45.121	0.091	1.325
Shaliu River	SLH-4	2016-01-19	0.283168					3.112	44.72	0.076	1.094
Shaliu River	SLH-4	2016-01-20	0.254851	2.47662	39.1457	0.0545331	0.861956	3.125	44.408	0.069	0.978
Shaliu River	SLH-4	2016-01-21	0.254851					3.125	44.321	0.069	0.976
Shaliu River	SLH-4	2016-01-22	0.254851					3.125	44.235	0.069	0.974
Shaliu River	SLH-4	2016-01-23	0.254851					3.125	44.15	0.069	0.972
Shaliu River	SLH-4	2016-01-24	0.283168					3.112	44.29	0.076	1.084
Shaliu River	SLH-4	2016-01-25	0.283168					3.112	44.205	0.076	1.082
Shaliu River	SLH-4	2016-01-26	0.283168					3.112	44.123	0.076	1.08
Shaliu River	SLH-4	2016-01-27	0.283168					3.112	44.041	0.076	1.078
Shaliu River	SLH-4	2016-01-28	0.283168					3.112	43.959	0.076	1.076
Shaliu River	SLH-4	2016-01-29	0.283168					3.112	43.878	0.076	1.074
Shaliu River	SLH-4	2016-01-30	0.283168					3.112	43.796	0.076	1.072
Shaliu River	SLH-4	2016-01-31	0.283168					3.112	43.718	0.076	1.07
Shaliu River	SLH-4	2016-02-01	0.283168					3.112	43.637	0.076	1.068
Shaliu River	SLH-4	2016-02-02	0.283168					3.112	43.559	0.076	1.066
Shaliu River	SLH-4	2016-02-03	0.283168					3.112	43.485	0.076	1.064
Shaliu River	SLH-4	2016-02-04	0.311485					3.1	43.579	0.083	1.173
Shaliu River	SLH-4	2016-02-05	0.311485	3.57959	41.3812	0.096335	1.11366	3.1	43.504	0.083	1.171
Shaliu River	SLH-4	2016-02-06	0.311485					3.1	43.43	0.083	1.169
Shaliu River	SLH-4	2016-02-07	0.311485					3.1	43.356	0.083	1.167
Shaliu River	SLH-4	2016-02-08	0.311485					3.1	43.285	0.083	1.165
Shaliu River	SLH-4	2016-02-09	0.311485					3.1	43.214	0.083	1.163
Shaliu River	SLH-4	2016-02-10	0.311485					3.1	43.144	0.083	1.161
Shaliu River	SLH-4	2016-02-11	0.311485					3.1	43.073	0.083	1.159
Shaliu River	SLH-4	2016-02-12	0.311485					3.1	43.006	0.083	1.157
Shaliu River	SLH-4	2016-02-13	0.311485					3.1	42.939	0.083	1.156
Shaliu River	SLH-4	2016-02-14	0.311485					3.1	42.873	0.083	1.154
Shaliu River	SLH-4	2016-02-15	0.311485					3.1	42.809	0.083	1.152
Shaliu River	SLH-4	2016-02-16	0.311485					3.1	42.746	0.083	1.15
Shaliu River	SLH-4	2016-02-17	0.311485					3.1	42.683	0.083	1.149
Shaliu River	SLH-4	2016-02-18	0.311485					3.1	42.62	0.083	1.147
Shaliu River	SLH-4	2016-02-19	0.311485					3.1	42.56	0.083	1.145
Shaliu River	SLH-4	2016-02-20	0.311485	2.31573	47.235	0.0623215	1.2712	3.1	42.501	0.083	1.144
Shaliu River	SLH-4	2016-02-21	0.311485					3.1	42.442	0.083	1.142
Shaliu River	SLH-4	2016-02-22	0.311485					3.1	42.386	0.083	1.141
Shaliu River	SLH-4	2016-02-23	0.311485					3.1	42.33	0.083	1.139
Shaliu River	SLH-4	2016-02-24	0.311485					3.1	42.274	0.083	1.138
Shaliu River	SLH-4	2016-02-25	0.311485					3.1	42.222	0.083	1.136
Shaliu River	SLH-4	2016-02-26	0.311485					3.1	42.17	0.083	1.135
Shaliu River	SLH-4	2016-02-27	0.311485					3.1	42.118	0.083	1.134
Shaliu River	SLH-4	2016-02-28	0.339802					3.09	42.198	0.091	1.239
Shaliu River	SLH-4	2016-02-29	0.339802					3.09	42.151	0.091	1.238
Shaliu River	SLH-4	2016-03-01	0.339802					3.09	42.103	0.091	1.236
Shaliu River	SLH-4	2016-03-02	0.339802					3.09	42.059	0.091	1.235
Shaliu River	SLH-4	2016-03-03	0.339802					3.09	42.015	0.091	1.234
Shaliu River	SLH-4	2016-03-04	0.339802					3.09	41.97	0.091	1.232
Shaliu River	SLH-4	2016-03-05	0.339802	3.94273	51.5393	0.115754	1.51314	3.09	41.926	0.091	1.231
Shaliu River	SLH-4	2016-03-06	0.481386					3.047	42.189	0.127	1.755
Shaliu River	SLH-4	2016-03-07	0.62297					3.016	42.144	0.162	2.268
Shaliu River	SLH-4	2016-03-08	0.736237					2.996	42.004	0.191	2.672
Shaliu River	SLH-4	2016-03-09	0.877821					2.975	41.774	0.226	3.168
Shaliu River	SLH-4	2016-03-10	1.01941					2.958	41.508	0.261	3.656
Shaliu River	SLH-4	2016-03-11	1.13267					2.945	41.277	0.288	4.04
Shaliu River	SLH-4	2016-03-12	1.27426					2.931	40.989	0.323	4.513
Shaliu River	SLH-4	2016-03-13	1.38752					2.921	40.753	0.35	4.886
Shaliu River	SLH-4	2016-03-14	1.52911					2.91	40.466	0.384	5.346
Shaliu River	SLH-4	2016-03-15	1.67069					2.9	40.184	0.419	5.8
Shaliu River	SLH-4	2016-03-16	1.78396					2.892	39.959	0.446	6.159
Shaliu River	SLH-4	2016-03-17	1.92554					2.883	39.689	0.48	6.603
Shaliu River	SLH-4	2016-03-18	2.06713					2.875	39.426	0.513	7.042
Shaliu River	SLH-4	2016-03-19	2.1804					2.869	39.218	0.54	7.388
Shaliu River	SLH-4	2016-03-20	2.32198	3.49152	35.387	0.700466	7.09931	2.862	38.97	0.574	7.818
Shaliu River	SLH-4	2016-03-21	2.26535					2.864	39.048	0.561	7.643
Shaliu River	SLH-4	2016-03-22	2.20871					2.867	39.128	0.547	7.467
Shaliu River	SLH-4	2016-03-23	2.15208					2.87	39.211	0.534	7.291
Shaliu River	SLH-4	2016-03-24	2.09544					2.873	39.295	0.52	7.114
Shaliu River	SLH-4	2016-03-25	2.06713					2.875	39.333	0.513	7.025
Shaliu River	SLH-4	2016-03-26	2.01049					2.878	39.42	0.5	6.848
Shaliu River	SLH-4	2016-03-27	1.95386					2.882	39.51	0.486	6.67
Shaliu River	SLH-4	2016-03-28	1.89723					2.885	39.601	0.473	6.492
Shaliu River	SLH-4	2016-03-29	1.84059					2.888	39.694	0.459	6.312
Shaliu River	SLH-4	2016-03-30	1.78396					2.892	39.789	0.446	6.133
Shaliu River	SLH-4	2016-03-31	1.72733					2.896	39.886	0.432	5.953
Shaliu River	SLH-4	2016-04-01	1.67069					2.9	39.985	0.419	5.772
Shaliu River	SLH-4	2016-04-02	1.64238					2.902	40.034	0.412	5.681
Shaliu River	SLH-4	2016-04-03	1.58574					2.906	40.136	0.398	5.499
Shaliu River	SLH-4	2016-04-04	1.52911					2.91	40.238	0.384	5.316
Shaliu River	SLH-4	2016-04-05	1.47247	2.80785	35.6839	0.35722	4.53977	2.915	40.341	0.371	5.132
Shaliu River	SLH-4	2016-04-06	1.61406					2.904	40.096	0.405	5.592
Shaliu River	SLH-4	2016-04-07	1.72733					2.896	39.905	0.432	5.955
Shaliu River	SLH-4	2016-04-08	1.86891					2.887	39.669	0.466	6.406
Shaliu River	SLH-4	2016-04-09	2.01049					2.878	39.439	0.5	6.851
Shaliu River	SLH-4	2016-04-10	2.12376					2.872	39.262	0.527	7.204
Shaliu River	SLH-4	2016-04-11	2.26535					2.864	39.046	0.561	7.642
Shaliu River	SLH-4	2016-04-12	2.40693					2.857	38.836	0.594	8.076
Shaliu River	SLH-4	2016-04-13	2.5202					2.852	38.676	0.621	8.422
Shaliu River	SLH-4	2016-04-14	2.66178					2.846	38.478	0.654	8.849
Shaliu River	SLH-4	2016-04-15	2.80337					2.84	38.287	0.688	9.274
Shaliu River	SLH-4	2016-04-16	2.91663					2.835	38.143	0.714	9.612
Shaliu River	SLH-4	2016-04-17	3.05822					2.83	37.963	0.748	10.031
Shaliu River	SLH-4	2016-04-18	3.1998					2.825	37.792	0.781	10.448
Shaliu River	SLH-4	2016-04-19	3.31307					2.821	37.659	0.807	10.78
Shaliu River	SLH-4	2016-04-20	3.45465	2.80785	46.1602	0.838093	13.778	2.816	37.5	0.84	11.193
Shaliu River	SLH-4	2016-04-21	3.22812					2.824	37.826	0.788	10.55
Shaliu River	SLH-4	2016-04-22	3.00158					2.832	38.162	0.734	9.897
Shaliu River	SLH-4	2016-04-23	2.77505					2.841	38.514	0.681	9.234
Shaliu River	SLH-4	2016-04-24	2.54851					2.851	38.878	0.628	8.561
Shaliu River	SLH-4	2016-04-25	2.32198					2.862	39.256	0.574	7.876
Shaliu River	SLH-4	2016-04-26	2.09544					2.873	39.649	0.52	7.178
Shaliu River	SLH-4	2016-04-27	1.84059					2.888	40.101	0.459	6.377
Shaliu River	SLH-4	2016-04-28	1.61406					2.904	40.518	0.405	5.65
Shaliu River	SLH-4	2016-04-29	1.38752					2.921	40.939	0.35	4.908
Shaliu River	SLH-4	2016-04-30	1.16099					2.942	41.355	0.295	4.148
