# Supplementary material for: Spatial–temporal variations in riverine carbon strongly influenced by local hydrological events in an alpine catchment
Source: Copernicus journal article supplement (doi:10.5194/bg-18-3015-2021), 2021-05-20
Supplement: Supplementary file [file bg-18-3015-2021-supplement-title-page.pdf › bg-18-3015-2021-supplement-title-page.pdf]

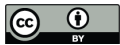

## *Supplement of*

# **Spatial–temporal variations in riverine carbon strongly influenced by local hydrological events in an alpine catchment**

**Xin Wang et al.**

*Correspondence to:* Xiaojuan Feng (xfeng@ibcas.ac.cn)

- bg-18-3015-2021-supplement-title-page.pdf
- bg-2020-472-SI
  - Dataset for LOADEST\_bg-2020-472
    - \* Dataset for LOADEST.xlsx
  - bg-2020-472-SI.pdf

The copyright of individual parts of the supplement might differ from the article licence.
